# Supplementary material for: Comparison of gravity wave propagation directions observed by mesospheric airglow imaging at three different latitudes using the M-transform
Source: Copernicus journal article supplement (doi:10.5194/angeo-36-1597-2018), 2018-11-30
Supplement: Supplementary file 1 [file angeo-36-1597-2018-supplement.zip]

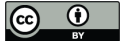

*Supplement of*

**Comparison of gravity wave propagation directions observed  
by mesospheric airglow imaging at three different latitudes  
using the M-transform**

**Septi Perwitasari et al.**

*Correspondence to:* Septi Perwitasari (septi.perwitasari@gmail.com)

- `angeo-36-1597-2018-supplement-title-page.pdf`
- `Supplementary_file_1_110920_syowa_movie.mov`
- `__MACOSX`
  - `._Supplementary_file_1_110920_syowa_movie.mov`

The copyright of individual parts of the supplement might differ from the CC BY 4.0 License.
